# Supplementary material for: Estimating and tracking the remaining carbon budget for stringent climate targets
Source: Springer Nature journal article supplement (doi:10.1038/s41586-019-1368-z), 2019-07-17
Supplement: 41586_2019_1368_MOESM1_ESM.pdf [file 41586_2019_1368_MOESM1_ESM.pdf]

In the format provided by the authors and unedited.

# Estimating and tracking the remaining carbon budget for stringent climate targets

Joeri Rogelj<sup>1,2,3\*</sup>, Piers M. Forster<sup>4</sup>, Elmar Kriegler<sup>5</sup>, Christopher J. Smith<sup>4</sup> & Roland Séférian<sup>6</sup>

---

<sup>1</sup>Grantham Institute for Climate Change and the Environment, Imperial College London, London, UK. <sup>2</sup>International Institute for Applied Systems Analysis (IIASA), Laxenburg, Austria. <sup>3</sup>Institute for Atmospheric and Climate Science, ETH Zurich, Zurich, Switzerland. <sup>4</sup>Priestley International Centre for Climate, University of Leeds, Leeds, UK. <sup>5</sup>Potsdam Institute for Climate Impact Research, Leibniz Association, Potsdam, Germany. <sup>6</sup>CNRM, Université de Toulouse, Météo-France, CNRS, Toulouse, France. \*e-mail: [j.rogelj@imperial.ac.uk](mailto:j.rogelj@imperial.ac.uk)

# Supplementary Information:

## A framework to estimate and track remaining carbon budgets for stringent climate targets

### Authors:

Joeri Rogelj<sup>1,2,3,\*</sup>, Piers M. Forster<sup>4</sup>, Elmar Kriegler<sup>5</sup>, Chris Smith<sup>4</sup>, Roland Séférian<sup>6</sup>

### Affiliations:

1 Grantham Institute for Climate Change and the Environment, Imperial College London, Prince Consort Road, London SW7 2AZ, UK

2 International Institute for Applied Systems Analysis (IIASA), Laxenburg, Austria

3 Institute for Atmospheric and Climate Science, ETH Zurich, Universitätstrasse 16, 8006 Zurich, Switzerland

4 Priestley International Centre for Climate, University of Leeds, Leeds LS2 9JT, UK

5 Potsdam Institute for Climate Impact Research, Potsdam, Germany

6 CNRM, Université de Toulouse, Météo-France, CNRS, Toulouse, France

### ORCID:

Joeri Rogelj: <https://orcid.org/0000-0003-2056-9061>

Piers Forster: <https://orcid.org/0000-0002-6078-0171>

Chris Smith: <https://orcid.org/0000-0003-0599-4633>

Elmar Kriegler: <https://orcid.org/0000-0002-3307-2647>

Roland Séférian: <https://orcid.org/0000-0002-2571-2114>

\*: corresponding author

### Supplementary Text 1: Extending beyond peak warming

The framework proposed in the main text is designed to transparently estimate the remaining carbon budget until peak warming. Extending the framework to also apply to remaining carbon budgets in line with returning to a specific level of global temperature increase after having temporarily exceeded it ( $RB_{lim,postOS}$ ), referred to as an overshoot (OS, see also Threshold Return Budgets in Box 1 of the main text), would require several additional uncertainties to be assessed. This includes, the symmetry of TCRE under net positive ( $TCRE$ ) and negative ( $TCRE_{neg}$ ) fluxes of carbon (e.g. ref. 1), the non-linearity in Earth system response feedbacks and hysteresis<sup>2</sup> ( $E_{ESfb,withOS}$ ), and the evolution of non-CO<sub>2</sub> warming until temperature is returned to the intended level of global warming<sup>3-5</sup>, represented by SI Equation 1.

$$RB_{lim,postOS} = (T_{zeroCO_2} - T_{hist} - T_{nCO_2} - T_{ZEC}) \times TCRE^{-1} + (T_{lim,postOS} - T_{zeroCO_2} + T_{nCO_2} - T_{nCO_2,postOS} + T_{ZEC} - T_{ZEC,neg}) \times TCRE_{neg}^{-1} - \frac{E_{ESfb,withOS}}{SI \text{ Eq. (1)}}$$

In addition to the terms defined earlier,  $T_{zeroCO_2}$  here represents the human-induced temperature increase reached during the temporary overshoot,  $T_{lim,postOS}$  the limit to which human-induced temperature increase is ultimately kept after overshoot,  $T_{nCO_2,postOS}$  the non-CO<sub>2</sub> warming contribution at the time of returning total human-induced warming to the desired limit, and  $T_{ZEC,neg}$  the zero emission commitment adjustment due to potential time lags in cooling as a result of net removal of CO<sub>2</sub> from the atmosphere. In general, the terms involved in defining the remaining carbon budget for limiting warming to a specific temperature threshold after an overshoot are less precisely defined as for the remaining carbon budget until net zero CO<sub>2</sub> emissions and hence peak warming. When looking at the bigger picture, uncertainties and sustainability concerns related to the technical achievement of CO<sub>2</sub> removal at a global scale are probably much larger at present.

## Supplementary Text 2: Issues surrounding definitions of $T_{lim}$ and $T_{hist}$

The 1850–1900 period is often used as a proxy for preindustrial levels, because it benefits from the availability of historical observational temperature records, stretching back to the beginning of that period<sup>6</sup>. The period has also been used by the IPCC in the reports that fed into the international climate policy process over the 2013–2015 period, leading up to the Paris Agreement<sup>7,8</sup>. Using the 1850–1900 period also has drawbacks. For example, the period includes a large volcanic eruption, the 1883 eruption of Mount Krakatoa in Indonesia, and this eruption is estimated to have lowered the average temperature in that period<sup>9,10</sup>. Furthermore, earlier time periods, like the mid-1700s, have been suggested as better proxies for preindustrial conditions<sup>11–13</sup>. While true from a historical point of view, data limitations make estimating temperature rise since time periods before the early 19<sup>th</sup> century more challenging<sup>11–13</sup>.

The next aspect determining the remaining allowable warming is the choice of metric by which global average temperature change is estimated. An important difference exists in how global average temperature is defined in studies analysing climate model simulations and in observational products. Climate model output is often expressed as the globally area-averaged change in surface air temperature (SAT) to estimate global average temperature increase; that is, the temperature at about 1.5m above the Earth's surface. Observational products, however, have to rely on the set of actual measurements available. They hence use a combination of SATs (as measured in a typical weather station) over land and sea-ice regions, and sea surface temperatures (SSTs, the temperature in the ocean's top layer as measured by ships) over open ocean<sup>6</sup>. SSTs generally warm slightly slower than SATs. Moreover, observations are not covering the globe homogeneously, and are notably absent in areas near the poles. Different observational products deal differently with this incomplete coverage<sup>14,15</sup>. Recent studies<sup>16,17</sup> estimate that the combined effect of using a mix of SSTs and SATs, and the limited observational coverage can result in an estimate of global average temperature rise to date that is more than 10% lower than if estimated from SATs covering the entire globe (Supplementary Figure 1).

### Supplementary Text 3: reporting check-list of factors affecting remaining carbon budget estimates

- Type of budget estimated, or new definition of remaining carbon budget (see Box 1, including whether the estimate is for CO<sub>2</sub> only or takes into account all forcings)
- Estimate of historical warming to date as used by remaining carbon budget estimate (implicitly or explicitly)
- Value or distribution of TCRE used in the estimate (implicitly or explicitly)
- Surface temperature measure used (we recommend using globally averaged surface air temperatures – see main text and Supplementary Text 2)
- Starting date for remaining carbon budget estimate
- How underrepresented Earth-system feedbacks are included in the estimate (in TCRE or otherwise)
- Estimate of non-CO<sub>2</sub> contribution to future warming, including assumptions surrounding forcings and climate response
- Method or tool that was used to derive estimate (EMIC, ESM, observations, analytical framework, ...)

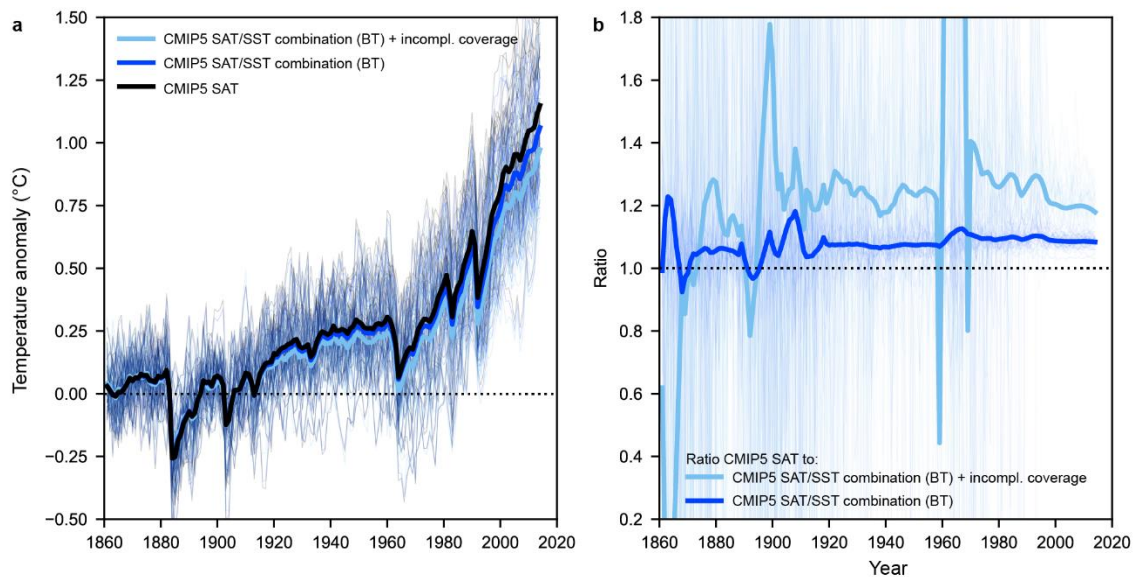

**Supplementary Figure 1 | Time evolution and ratio between various global average temperature metrics.** **a**, evolution of global average temperature over time based on the historical simulations of the fifth phase of the coupled model intercomparison project<sup>18</sup> (CMIP5). Thin lines show single model projections, thick lines the multi-model mean. Three temperature metrics are shown relative to the 1861-1900 period: global coverage of surface air temperatures (SAT), a blended metric (BT) combining SAT over land and sea surface temperatures over water (SAT/SST combination), and a metric using the same temperature fields but assuming the same incomplete coverage as observational measurements<sup>6</sup>. Data from ref. <sup>19</sup>; **b**, ratio between global SAT temperature and temperatures estimated with the two other metrics shown in panel **a**. Ratios in panel **b** are calculated from time series smoothed with an 11-year 3rd order Savitzky-Golay smoothing filter<sup>20</sup> applied to the multi-model mean time series.

**Supplementary Table 1 | Interpretation of literature estimates in the context of the remaining carbon budget framework.** Mapping of assumptions made by a selection of studies in their approaches to estimate remaining carbon budgets in line with stringent mitigation targets onto the various terms defining the remaining carbon budget framework proposed in this paper. SAT: global average near-surface air temperatures; BT: blended temperature metric using a mix of SAT over land and sea-ice regions and sea-surface temperatures (SST) over open ocean; ESM: Earth system model; EMIC: Earth system model of intermediate complexity; RCP: representative concentration pathway; AR5: Fifth Assessment Report of the Intergovernmental Panel on Climate Change (IPCC); SR15: IPCC Special Report on Global Warming of 1.5°C; CMIP5: Phase 5 of the coupled model intercomparison project. Estimates are listed in the same order as shown in Figure 2 in the main paper.

|   |                                            | Historical human-induced warming                                                                | Future non-CO <sub>2</sub> contribution to global temperature rise                                                                    | Zero emissions commitment      | Transient climate response to cumulative emissions of CO <sub>2</sub>                                                                     | Unrepresented Earth system feedbacks                                                                 | Temperature limit metric                                                   |
|---|--------------------------------------------|-------------------------------------------------------------------------------------------------|---------------------------------------------------------------------------------------------------------------------------------------|--------------------------------|-------------------------------------------------------------------------------------------------------------------------------------------|------------------------------------------------------------------------------------------------------|----------------------------------------------------------------------------|
| # | Symbol                                     | $T_{hist}$                                                                                      | $T_{nCO_2}$                                                                                                                           | $T_{ZEC}$                      | $TCRE$                                                                                                                                    | $E_{ESfb}$                                                                                           | $T_{lim}$                                                                  |
| 1 | IPCC SR1.5 (2018) <sup>5</sup>             | 0.97°C in SAT until 2006–2015 relative to 1850-1900                                             | Explicitly estimated from pathways reaching net zero CO <sub>2</sub> emissions <sup>3-5</sup>                                         | Assumed to be negligibly small | Assessed IPCC uncertainty range of 0.8-2.5°C/1000PgC, with a normal distribution                                                          | Not explicitly taken into account                                                                    | SAT                                                                        |
| 2 | IPCC SR1.5 (2018) <sup>5</sup>             | 0.97°C in SAT until 2006–2015 relative to 1850-1900                                             | Explicitly estimated from pathways reaching net zero CO <sub>2</sub> emissions <sup>3-5</sup>                                         | Assumed to be negligibly small | Assessed IPCC uncertainty range of 0.8-2.5°C/1000PgC, with a normal uncertainty distribution                                              | Assessed to reduce carbon budgets by 100 GtCO <sub>2</sub> until 2100, and more thereafter           | SAT                                                                        |
| 3 | IPCC SR1.5 (2018) <sup>5</sup>             | 0.87°C in BT until 2006–2015 relative to 1850-1900                                              | Explicitly estimated from pathways reaching net zero CO <sub>2</sub> emissions <sup>3-5</sup>                                         | Assumed to be negligibly small | Assessed IPCC uncertainty range of 0.8-2.5°C/1000PgC, with a normal uncertainty distribution                                              | Not explicitly taken into account                                                                    | BT for historical warming and SAT for projections                          |
| 4 | IPCC SR1.5 (2018) <sup>5</sup>             | 0.87°C in BT until 2006–2015 relative to 1850-1900                                              | Explicitly estimated from pathways reaching net zero CO <sub>2</sub> emissions <sup>3-5</sup>                                         | Assumed to be negligibly small | Assessed IPCC uncertainty range of 0.8-2.5°C/1000PgC, with a normal uncertainty distribution                                              | Assessed to reduce remaining carbon budgets by 100 GtCO <sub>2</sub> until 2100, and more thereafter | BT for historical warming and SAT for projections                          |
| 5 | Tokarska and Gillett (2018) <sup>21</sup>  | 0.89 °C in BT for 2006-2015 relative to the 1861-1880 period                                    | Implicit, based on modelled warming by 16 ESMs for RCP4.5 and RCP8.5 <sup>13,22</sup>                                                 | Implicitly assumed to be zero  | Implicit distribution from 16 ESMs, some with multiple ensemble members, in some case constrained by historical CO <sub>2</sub> estimates | Discussed, but not explicitly taken into account                                                     | BT for historical warming and SAT for projections                          |
| 6 | Friedlingstein et al. (2014) <sup>23</sup> | 0.61°C in BT for 1986-2005 relative to 1850-1900 period                                         | Explicitly estimated from integrated pathways at time of exceeding 1.5°C of warming in weak mitigation scenarios <sup>24</sup>        | Assumed to be zero             | Implicit from observationally constrained scenario setup consistent with AR5 climate sensitivity assessment                               | Not explicitly taken into account                                                                    | BT for historical warming and SAT for projections                          |
| 7 | Millar et al (2017) <sup>25</sup>          | About 0.9°C in BT from the mid-nineteenth century to the present decade                         | Implicit, based on modelled warming by 15 ESMs and 5 EMICs for RCP8.5 <sup>13,22</sup>                                                | Implicitly assumed to be zero  | Implicit distribution from 15 ESMs and 5 EMICs                                                                                            | Not explicitly taken into account                                                                    | BT for historical warming and SAT for projections                          |
| 8 | Goodwin et al (2018) <sup>26</sup>         | 90% within ± 0.05°C range of BT from observed HadCRUT4 <sup>6</sup> 2007-2016 rel. to 1850-1900 | Implicit, based on arbitrary distribution of non-CO <sub>2</sub> forcing across the four RCPs at time of crossing 1.5°C <sup>13</sup> | Implicitly assumed to be zero  | Implicit distribution based on explicit uncertainty assessment of nine earth system properties                                            | Not explicitly taken into account                                                                    | BT due to observational constraints of earth system properties based on BT |
| 9 | IPCC AR5 (2014) <sup>27</sup>              | 1.1°C by 2011 in SAT, based implicitly on projections in 15 ESMs and 5 EMICs.                   | Implicit, based on modelled warming in RCP8.5 <sup>13,22</sup>                                                                        | Assumed to be zero             | Implicit distribution from 15 ESMs and 5 EMICs                                                                                            | Not explicitly taken into account                                                                    | SAT                                                                        |

|    |                                               | Historical human-induced warming                                                                | Future non-CO <sub>2</sub> contribution to global temperature rise                                                               | Zero emissions commitment                                                  | Transient climate response to cumulative emissions of CO <sub>2</sub>                                                  | Unrepresented Earth system feedbacks                                       | Temperature limit metric                                                                                                          |
|----|-----------------------------------------------|-------------------------------------------------------------------------------------------------|----------------------------------------------------------------------------------------------------------------------------------|----------------------------------------------------------------------------|------------------------------------------------------------------------------------------------------------------------|----------------------------------------------------------------------------|-----------------------------------------------------------------------------------------------------------------------------------|
| #  | Symbol                                        | $T_{hist}$                                                                                      | $T_{nCO_2}$                                                                                                                      | $T_{ZEC}$                                                                  | $TCRE$                                                                                                                 | $E_{ESfb}$                                                                 | $T_{lim}$                                                                                                                         |
| 10 | Mengis et al (2018) <sup>28</sup>             | Estimates start from preindustrial levels                                                       | Explicit, based on modelled warming from RCP2.6 non-CO <sub>2</sub> greenhouse gas and spatial aerosol emissions                 | Implicitly by diagnosing emissions for stabilizing global warming at 1.5°C | Implicit from observationally constrained perturbed parameter ensemble with variations in land and ocean carbon uptake | Not explicitly taken into account                                          | Consistent with BT for historical warming                                                                                         |
| -- | Mengis et al (2018) <sup>28</sup> (not shown) | Estimates start from preindustrial levels                                                       | Explicit, based on modelled warming from RCP2.6 non-CO <sub>2</sub> greenhouse gas and spatial aerosol emissions until 2200      | Implicitly by diagnosing emissions for stabilizing global warming at 1.5°C | Implicit from observationally constrained perturbed parameter ensemble with variations in land and ocean carbon uptake | Not explicitly taken into account                                          | Consistent with BT for historical warming                                                                                         |
| 11 | Matthews et al (2018) <sup>29</sup>           | Estimates start from preindustrial levels                                                       | Implicit: ratio of non-CO <sub>2</sub> to CO <sub>2</sub> forcing assumed to remain constant, with potential changes highlighted | Assumed to be negligibly small                                             | Inferred from total warming in CMIP5 models (1.86°C/1000PgC)                                                           | Not explicitly taken into account                                          | SAT                                                                                                                               |
| 12 | Matthews et al (2018) <sup>29</sup>           | Estimates start from preindustrial levels                                                       | Implicit ratio of non-CO <sub>2</sub> to CO <sub>2</sub> forcing assumed to remain constant, with potential changes highlighted  | Assumed to be negligibly small                                             | Inferred from observations (1.78°C/1000PgC)                                                                            | Not explicitly taken into account                                          | BT                                                                                                                                |
| 13 | Gasser et al (2018) <sup>30</sup>             | Estimates start from preindustrial, with warming based implicitly on CMIP5 models due to tuning | Implicit, based on modelled warming across the four RCPs                                                                         | Assumed to be zero                                                         | No distribution assumed, but variation due to four permafrost emulations                                               | Permafrost explicitly not accounted by switching off permafrost modules    | Not explicitly reported. Assumed to be SAT due to tuning to a selection of CMIP5 models                                           |
| 14 | Gasser et al (2018) <sup>30</sup>             | Estimates start from preindustrial, with warming based implicitly on CMIP5 models due to tuning | Implicit, based on modelled warming across the four RCPs                                                                         | Assumed to be zero                                                         | No distribution assumed, but variation due to four permafrost emulations                                               | Permafrost explicitly accounted for by emulation of four permafrost models | Not explicitly reported. Assumed to be SAT due to tuning to a selection of CMIP5 models                                           |
| 15 | IPCC AR5 (2014) <sup>27</sup>                 | 0.61°C in BT for 1986-2005 relative to 1850-1900 period                                         | Explicitly estimated from integrated pathways at their time of peak warming <sup>24</sup>                                        | Assumed to be zero                                                         | Implicit from observationally constrained setup consistent with AR5 climate sensitivity assessment                     | Not explicitly taken into account                                          | BT for historical warming and SAT for projections, but imprecise target T level                                                   |
| 16 | Rogelj et al (2018) <sup>31</sup>             | 0.61°C in BT for 1986-2005 relative to 1850-1900 period                                         | Explicitly estimated from pathways at their time of reaching 1.9 W/m <sup>2</sup> of total anthropogenic radiative forcing       | Implicitly assumed to be zero                                              | Implicit from observationally constrained scenario setup consistent with AR5 climate sensitivity assessment            | Not explicitly taken into account                                          | varying levels of warming consistent with 1.9 W/m <sup>2</sup> forcing in 2100, BT for historical warming and SAT for projections |



### Supplementary Table 2 | Comparison of literature estimates of remaining carbon budgets.

Remaining carbon budgets reported for limiting warming to 1.5°C or 2°C with 50 and 66% probability. Note that in some cases, studies do not formally represent the uncertainty in TCRE and rather report a frequency distribution of models instead (see main text). Estimates are listed in the same order as shown in Figure 2 in the main paper and the same order as in Supplementary Table 1.

| #  | Source                                                                  | Remaining carbon budget method                            | Reported values for 50% chance of limiting warming to 1.5°C (or best estimate)                            | Expressed relative to the start of 2018 in GtCO <sub>2</sub> | Reported values for 50% chance of limiting warming to 2°C (or best estimate)               | Expressed relative to the start of 2018 in GtCO <sub>2</sub> |
|----|-------------------------------------------------------------------------|-----------------------------------------------------------|-----------------------------------------------------------------------------------------------------------|--------------------------------------------------------------|--------------------------------------------------------------------------------------------|--------------------------------------------------------------|
| 1  | IPCC SR1.5 (2018) <sup>5</sup> SAT                                      | TCRE-based                                                | 580 GtCO <sub>2</sub> from 2018 onwards                                                                   | 580                                                          | 1500 GtCO <sub>2</sub> from 2018 onwards                                                   | 1500                                                         |
| 2  | IPCC SR1.5 (2018) <sup>5</sup> SAT with add. Earth system feedback      | TCRE-based                                                | 480 GtCO <sub>2</sub> from 2018 onwards                                                                   | 480                                                          | 1400 GtCO <sub>2</sub> from 2018 onwards                                                   | 1400                                                         |
| 3  | IPCC SR1.5 (2018) <sup>5</sup> BT                                       | TCRE-based                                                | 770 GtCO <sub>2</sub> from 2018 onwards                                                                   | 770                                                          | 1690 GtCO <sub>2</sub> from 2018 onwards                                                   | 1690                                                         |
| 4  | IPCC SR1.5 (2018) <sup>5</sup> BT with add. Earth system feedback       | TCRE-based                                                | 670 GtCO <sub>2</sub> from 2018 onwards                                                                   | 670                                                          | 1590 GtCO <sub>2</sub> from 2018 onwards                                                   | 1590                                                         |
| 5  | Tokarska and Gillett (2018) <sup>21</sup>                               | TEB                                                       | 208 GtC from 2016                                                                                         | 761                                                          | N/A                                                                                        | N/A                                                          |
| 6  | Friedlingstein et al. (2014) <sup>23</sup>                              | TEB                                                       | 735 (545,950; range across scenarios) GtCO <sub>2</sub> from 2015 (own calculations based on same method) | 653 (463,868)                                                | 1500 (1100,1900; range across scenarios) GtCO <sub>2</sub> from 2015                       | 1418 (1018,1818)                                             |
| 7  | Millar et al (2017) <sup>25</sup>                                       | TEB                                                       | about 223 GtC from 2016 onward                                                                            | 735                                                          | about 416 GtC from 2016 onward                                                             | 1441                                                         |
| 8  | Goodwin et al (2018) <sup>26</sup>                                      | TEB                                                       | 215 to 225 PgC from 2017 onwards                                                                          | 746 to 783                                                   | 425 to 440 PgC from 2017 onwards                                                           | 1515 to 1570                                                 |
| 9  | IPCC AR5 (2013-2014) <sup>27</sup>                                      | TEB                                                       | 550 GtCO <sub>2</sub> from 2011                                                                           | 265                                                          | 1300 GtCO <sub>2</sub> from 2011                                                           | 1015                                                         |
| 10 | Mengis et al (2018) <sup>28</sup>                                       | Peak temperature (year 2055)                              | 699 PgC (641 to 758 PgC; 95%) from preindustrial (570 PgC est. until 2015)                                | 349 (137 to 565)                                             | N/A                                                                                        | N/A                                                          |
| -- | Mengis et al (2018) <sup>28</sup> (not shown)                           | Peak temperature sustained until 2200                     | 625 PgC (565 to 622 PgC; 95%) from preindustrial (570 PgC est. until 2015)                                | 201 (-18 to 190)                                             | N/A                                                                                        | N/A                                                          |
| 11 | Matthews et al (2018) <sup>29</sup>                                     | TCRE-based                                                | 2950 GtCO <sub>2</sub> since preindustrial (best estimate)                                                | 750                                                          | 3940 GtCO <sub>2</sub> since preindustrial (best estimate)                                 | 1740                                                         |
| 12 | Matthews et al (2018) <sup>29</sup>                                     | TCRE-based                                                | 3100 GtCO <sub>2</sub> since preindustrial (best estimate)                                                | 900                                                          | 4125 GtCO <sub>2</sub> since preindustrial                                                 | 1925                                                         |
| 13 | Gasser et al (2018) <sup>30</sup>                                       | TEB                                                       | 2290 to 2350 GtCO <sub>2</sub> from preindustrial (with 2240 GtCO <sub>2</sub> until 2017)                | 50 to 110                                                    | 3110 to 3240 GtCO <sub>2</sub> from preindustrial (with 2240 GtCO <sub>2</sub> until 2017) | 870 to 1000                                                  |
| 14 | Gasser et al (2018) <sup>30</sup>                                       | TEB (with permafrost)                                     | 2210 to 2350 GtCO <sub>2</sub> from preindustrial                                                         | -30 to 110                                                   | 2980 to 3230 GtCO <sub>2</sub> from preindustrial                                          | 740 to 990                                                   |
| 15 | IPCC AR5 (2013-2014) <sup>27</sup>                                      | TAB (peak)                                                | 550 to 600 GtCO <sub>2</sub> from 2011                                                                    | 265 to 315                                                   | 1150 to 1400 GtCO <sub>2</sub> from 2011                                                   | 865 to 1115                                                  |
| 16 | Rogelj et al (2018) <sup>31</sup> (value in next table shown in Fig. 2) | Cum. CO <sub>2</sub> until 2100 (Threshold return budget) | N/A                                                                                                       | N/A                                                          | N/A                                                                                        | N/A                                                          |

**Supplementary Table 2 – continued, for 66% probability**

| #  | Source                                                             | Remaining carbon budget method                            | Reported values for 66% chance of limiting warming to 1.5°C                                               | Expressed relative to the start of 2018 in GtCO <sub>2</sub> | Reported values for 66% chance of limiting warming to 2°C           | Expressed relative to the start of 2018 in GtCO <sub>2</sub> |
|----|--------------------------------------------------------------------|-----------------------------------------------------------|-----------------------------------------------------------------------------------------------------------|--------------------------------------------------------------|---------------------------------------------------------------------|--------------------------------------------------------------|
| 1  | IPCC SR1.5 (2018) <sup>5</sup> SAT                                 | TCRE-based                                                | 420 GtCO <sub>2</sub> from 2018 onwards                                                                   | 420                                                          | 1170 GtCO <sub>2</sub> from 2018 onwards                            | 1170                                                         |
| 2  | IPCC SR1.5 (2018) <sup>5</sup> SAT with add. Earth system feedback | TCRE-based                                                | 320 GtCO <sub>2</sub> from 2018 onwards                                                                   | 320                                                          | 1070 GtCO <sub>2</sub> from 2018 onwards                            | 1070                                                         |
| 3  | IPCC SR1.5 (2018) <sup>5</sup> BT                                  | TCRE-based                                                | 570 GtCO <sub>2</sub> from 2018 onwards                                                                   | 570                                                          | 1320 GtCO <sub>2</sub> from 2018 onwards                            | 1320                                                         |
| 4  | IPCC SR1.5 (2018) <sup>5</sup> BT with add. Earth system feedback  | TCRE-based                                                | 470 GtCO <sub>2</sub> from 2018 onwards                                                                   | 470                                                          | 1220 GtCO <sub>2</sub> from 2018 onwards                            | 1220                                                         |
| 5  | Tokarska and Gillett (2018) <sup>21</sup>                          | TEB                                                       | 130 GtC from 2016                                                                                         | 394                                                          | N/A                                                                 | N/A                                                          |
| 6  | Friedlingstein et al. (2014) <sup>23</sup>                         | TEB                                                       | 610 (425,820; range across scenarios) GtCO <sub>2</sub> from 2015 (own calculations based on same method) | 528 (343,738)                                                | 1200 (900,1600; range across scenarios) GtCO <sub>2</sub> from 2015 | 1118 (818,1518)                                              |
| 7  | Millar et al (2017) <sup>25</sup>                                  | TEB                                                       | about 200 GtC from 2016 onward                                                                            | 650                                                          | about 395 GtC from 2016 onward                                      | 1364                                                         |
| 8  | Goodwin et al (2018) <sup>26</sup>                                 | TEB                                                       | 195 to 205 PgC from 2017 onwards                                                                          | 673 to 710                                                   | 395 to 410 PgC from 2017 onwards                                    | 1405 to 1460                                                 |
| 9  | IPCC AR5 (2013-2014) <sup>27</sup>                                 | TEB                                                       | 400 GtCO <sub>2</sub> from 2011                                                                           | 115                                                          | 1000 GtCO <sub>2</sub> from 2011                                    | 715                                                          |
| 10 | Mengis et al (2018) <sup>28</sup>                                  | Peak temperature (year 2055)                              | N/A                                                                                                       | N/A                                                          | N/A                                                                 | N/A                                                          |
| -- | Mengis et al (2018) <sup>28</sup> (not shown)                      | Peak temperature sustained until 2200                     | N/A                                                                                                       | N/A                                                          | N/A                                                                 | N/A                                                          |
| 11 | Matthews et al (2018) <sup>29</sup>                                | TCRE-based                                                | N/A                                                                                                       | N/A                                                          | N/A                                                                 | N/A                                                          |
| 12 | Matthews et al (2018) <sup>29</sup>                                | TCRE-based                                                | N/A                                                                                                       | N/A                                                          | N/A                                                                 | N/A                                                          |
| 13 | Gasser et al (2018) <sup>30</sup>                                  | TEB                                                       | N/A                                                                                                       | N/A                                                          | N/A                                                                 | N/A                                                          |
| 14 | Gasser et al (2018) <sup>30</sup>                                  | TEB (with permafrost)                                     | N/A                                                                                                       | N/A                                                          | N/A                                                                 | N/A                                                          |
| 15 | IPCC AR5 (2013-2014) <sup>27</sup>                                 | TAB (peak)                                                | N/A                                                                                                       | N/A                                                          | 750 to 1400 GtCO <sub>2</sub> from 2011                             | 465 to 1115                                                  |
| 16 | Rogelj et al (2018) <sup>31</sup>                                  | Cum. CO <sub>2</sub> until 2100 (Threshold return budget) | -175 to 475 GtCO <sub>2</sub> from 2016 onward                                                            | -257 to 393                                                  | N/A                                                                 | N/A                                                          |

## References

- 1 Zickfeld, K. *et al.* Long-Term Climate Change Commitment and Reversibility: An EMIC Intercomparison. *Journal of Climate* **26**, 5782-5809, doi:10.1175/jcli-d-12-00584.1 (2013).
- 2 Zickfeld, K., MacDougall, A. H. & Matthews, H. D. On the proportionality between global temperature change and cumulative CO<sub>2</sub> emissions during periods of net negative CO<sub>2</sub> emissions. *Environmental Research Letters* **11**, 055006 (2016).
- 3 Huppmann, D., Rogelj, J., Kriegler, E., Krey, V. & Riahi, K. A new scenario resource for integrated 1.5 °C research. *Nature Climate Change* **8**, 1027-1030, doi:10.1038/s41558-018-0317-4 (2018).
- 4 Huppmann, D. *et al.* (Integrated Assessment Modeling Consortium & International Institute for Applied Systems Analysis, 2018).
- 5 Rogelj, J. *et al.* in *Global Warming of 1.5 °C: an IPCC special report on the impacts of global warming of 1.5 °C above pre-industrial levels and related global greenhouse gas emission pathways, in the context of strengthening the global response to the threat of climate change, sustainable development, and efforts to eradicate poverty* (eds Greg Flato, Jan Fuglestad, Rachid Mrabet, & Roberto Schaeffer) Ch. 2, (2018).
- 6 Morice, C. P., Kennedy, J. J., Rayner, N. A. & Jones, P. D. Quantifying uncertainties in global and regional temperature change using an ensemble of observational estimates: The HadCRUT4 data set. *Journal of Geophysical Research: Atmospheres* **117**, n/a-n/a, doi:10.1029/2011jd017187 (2012).
- 7 IPCC. *Climate Change 2013: The Physical Science Basis. Contribution of Working Group I to the Fifth Assessment Report of the Intergovernmental Panel on Climate Change.* (Cambridge University Press, 2013).
- 8 UNFCCC. FCCC/SB/2015/INF.1 - Report on the structured expert dialogue on the 2013–2015 review. 1-182 (UNFCCC, Bonn, Germany, 2015).
- 9 Hausteiner, K. *et al.* A real-time Global Warming Index. *Scientific Reports* **7**, 15417, doi:10.1038/s41598-017-14828-5 (2017).
- 10 Gleckler, P. J. *et al.* Krakatoa's signature persists in the ocean. *Nature* **439**, 675, doi:10.1038/439675a (2006).
- 11 Schurer, A. P., Mann, M. E., Hawkins, E., Tett, S. F. B. & Hegerl, G. C. Importance of the pre-industrial baseline for likelihood of exceeding Paris goals. *Nature Clim. Change* **7**, 563-567, doi:10.1038/nclimate3345 (2017).
- 12 Hawkins, E. *et al.* Estimating Changes in Global Temperature since the Preindustrial Period. *Bulletin of the American Meteorological Society* **98**, 1841-1856, doi:10.1175/bams-d-16-0007.1 (2017).
- 13 Meinshausen, M. *et al.* The RCP greenhouse gas concentrations and their extensions from 1765 to 2300. *Climatic Change* **109**, 213-241, doi:10.1007/s10584-011-0156-z (2011).
- 14 Cowtan, K. & Way, R. G. Coverage bias in the HadCRUT4 temperature series and its impact on recent temperature trends. *Quarterly Journal of the Royal Meteorological Society* **140**, 1935-1944, doi:10.1002/qj.2297 (2014).
- 15 Rohde, R. *et al.* Berkeley Earth Temperature Averaging Process. *Geoinfor Geostat: An Overview* **1**, doi:10.4172/2327-4581.1000103 (2013).
- 16 Richardson, M., Cowtan, K. & Millar, R. J. Global temperature definition affects achievement of long-term climate goals. *Environmental Research Letters* **13**, 054004 (2018).
- 17 Pfliederer, P., Schleussner, C.-F., Mengel, M. & Rogelj, J. Global mean temperature indicators linked to warming levels avoiding climate risks. *Environmental Research Letters* **13**, 064015 (2018).
- 18 Taylor, K. E., Stouffer, R. J. & Meehl, G. A. An Overview of CMIP5 and the Experiment Design. *Bulletin of the American Meteorological Society* **93**, 485–498, doi:10.1175/bams-d-11-00094.1 (2011).

- 19 Richardson, M., Cowtan, K., Hawkins, E. & Stolpe, M. B. Reconciled climate response estimates from climate models and the energy budget of Earth. *Nature Climate Change* **6**, 931, doi:10.1038/nclimate3066 (2016).
- 20 Savitzky, A. & Golay, M. J. E. Smoothing and Differentiation of Data by Simplified Least Squares Procedures. *Analytical Chemistry* **36**, 1627-1639, doi:10.1021/ac60214a047 (1964).
- 21 Tokarska, K. B. & Gillett, N. P. Cumulative carbon emissions budgets consistent with 1.5 °C global warming. *Nature Climate Change* **8**, 296-299, doi:10.1038/s41558-018-0118-9 (2018).
- 22 Riahi, K. *et al.* RCP 8.5—A scenario of comparatively high greenhouse gas emissions. *Climatic Change* **109**, 33-57, doi:10.1007/s10584-011-0149-y (2011).
- 23 Friedlingstein, P. *et al.* Persistent growth of CO<sub>2</sub> emissions and implications for reaching climate targets. *Nature Geoscience* **7**, 709-715, doi:10.1038/ngeo2248 (2014).
- 24 Clarke, L. *et al.* in *Climate Change 2014: Mitigation of Climate Change. Contribution of Working Group III to the Fifth Assessment Report of the Intergovernmental Panel on Climate Change* (eds O. Edenhofer *et al.*) Ch. 6, 413-510 (Cambridge University Press, 2014).
- 25 Millar, R. J. *et al.* Emission budgets and pathways consistent with limiting warming to 1.5 °C. *Nature Geoscience* **10**, 741, doi:10.1038/ngeo3031 (2017).
- 26 Goodwin, P. *et al.* Pathways to 1.5 °C and 2 °C warming based on observational and geological constraints. *Nature Geoscience* **11**, 102-107, doi:10.1038/s41561-017-0054-8 (2018).
- 27 IPCC. Climate Change 2014: Synthesis Report. Contribution of Working Groups I, II and III to the Fifth Assessment Report of the Intergovernmental Panel on Climate Change. 1-151 (IPCC, Geneva, Switzerland, 2014).
- 28 Mengis, N., Partanen, A.-I., Jalbert, J. & Matthews, H. D. 1.5 °C carbon budget dependent on carbon cycle uncertainty and future non-CO<sub>2</sub> forcing. *Scientific Reports* **8**, 5831, doi:10.1038/s41598-018-24241-1 (2018).
- 29 Matthews, H. D. *et al.* Estimating Carbon Budgets for Ambitious Climate Targets. *Current Climate Change Reports* **3**, 69-77, doi:10.1007/s40641-017-0055-0 (2017).
- 30 Gasser, T. *et al.* Path-dependent reductions in CO<sub>2</sub> emission budgets caused by permafrost carbon release. *Nature Geoscience*, doi:10.1038/s41561-018-0227-0 (2018).
- 31 Rogelj, J. *et al.* Scenarios towards limiting global mean temperature increase below 1.5 °C. *Nature Climate Change* **8**, 325-332, doi:10.1038/s41558-018-0091-3 (2018).
